# Supplementary material for: Extracting Multiscale Pattern Information of fMRI Based Functional Brain Connectivity with Application on Classification of Autism Spectrum Disorders
Source: PubMed Central journal article supplement (PMC3466274; doi:10.1371/journal.pone.0045502), 2012-10-08
Supplement: pone.0045502.s001.pdf [file pone.0045502.s001.pdf]

## Supplementary Material S1 for

### Extracting multiscale pattern information of fMRI based functional brain connectivity with application on classification of autism spectrum disorders

Hui Wang<sup>1</sup>, Chen Chen<sup>1</sup>, Hsieh Fushing<sup>1,\*</sup>

**1 Department of Statistics, University of California, Davis, One Shields Ave., Davis, CA, USA 95616**

\* E-mail: [fushing@wald.ucdavis.edu](mailto:fushing@wald.ucdavis.edu)

This file contains only a table.

**Table 1.** ROI names and coordinates

| ID | Name                 | x     | y      | z     | ID  | Name                 | x     | y     | z     |
|----|----------------------|-------|--------|-------|-----|----------------------|-------|-------|-------|
| 1  | Amygdala_L           | -23.5 | -1.95  | -18.5 | 54  | Lingual_R            | 16.1  | -68.1 | -5.22 |
| 2  | Amygdala_R           | 27.1  | -0.573 | -18.8 | 55  | Occipital_Inf_L      | -36.5 | -79.6 | -9.16 |
| 3  | Angular_L            | -44.4 | -62.1  | 34.3  | 56  | Occipital_Inf_R      | 37.9  | -83.2 | -8.99 |
| 4  | Angular_R            | 45.2  | -61.2  | 37.3  | 57  | Occipital_Mid_L      | -32.6 | -82.0 | 14.8  |
| 5  | Calcarine_L          | -7.48 | -79.8  | 5.10  | 58  | Occipital_Mid_R      | 37.1  | -81.0 | 18.1  |
| 6  | Calcarine_R          | 15.7  | -74.4  | 8.02  | 59  | Occipital_Sup_L      | -16.8 | -85.6 | 26.9  |
| 7  | Caudate_L            | -11.8 | 9.72   | 8.07  | 60  | Occipital_Sup_R      | 24.0  | -82.2 | 29.3  |
| 8  | Caudate_R            | 14.5  | 10.8   | 8.15  | 61  | Olfactory_L          | -8.26 | 13.9  | -12.7 |
| 9  | Cerebelum_10_L       | -8.12 | -38.4  | -19.8 | 62  | Olfactory_R          | 10.1  | 14.7  | -12.6 |
| 10 | Cerebelum_10_R       | 13.1  | -35.7  | -20.6 | 63  | Pallidum_L           | -18.1 | -1.36 | -10.4 |
| 11 | Cerebelum_3_L        | -14.3 | -44.7  | -18.3 | 64  | Pallidum_R           | 20.9  | -1.06 | -1.09 |
| 12 | Cerebelum_3_R        | 17.9  | -44.2  | -19.4 | 65  | ParaHippocampal_L    | -21.5 | -17.3 | -21.9 |
| 13 | Cerebelum_4_5_L      | -22.5 | -60.3  | -23.5 | 66  | ParaHippocampal_R    | 25.1  | -16.3 | -21.7 |
| 14 | Cerebelum_4_5_R      | 25.4  | -59.5  | -24.9 | 67  | Paracentral_Lobule_L | -7.97 | -26.7 | 68.7  |
| 15 | Cerebelum_6_L        | -31.6 | -61.0  | -46.8 | 68  | Paracentral_Lobule_R | 7.13  | -32.9 | 66.8  |
| 16 | Cerebelum_6_R        | 33.9  | -64.4  | -49.8 | 69  | Parietal_Inf_L       | -43.1 | -47.0 | 45.4  |
| 17 | Cerebelum_9_L        | -21.8 | -35.0  | -43.1 | 70  | Parietal_Inf_R       | 46.3  | -47.6 | 48.2  |
| 18 | Cerebelum_9_R        | 26.8  | -35.0  | -42.6 | 71  | Parietal_Sup_L       | -23.7 | -60.8 | 57.7  |
| 19 | Cerebelum_Crus1_L    | -35.4 | -67.9  | -30.3 | 72  | Parietal_Sup_R       | 25.8  | -60.4 | 60.7  |
| 20 | Cerebelum_Crus1_R    | 38.2  | -68.4  | -30.8 | 73  | Postcentral_L        | -42.9 | -23.8 | 47.5  |
| 21 | Cingulum_Ant_L       | -4.36 | 34.2   | 12.5  | 74  | Postcentral_R        | 41.2  | -26.8 | 51.3  |
| 22 | Cingulum_Ant_R       | 8.12  | 35.7   | 14.4  | 75  | Precentral_L         | -38.9 | -6.96 | 49.6  |
| 23 | Cingulum_Mid_L       | -5.88 | -16.1  | 40.2  | 76  | Precentral_R         | 41.1  | -9.55 | 50.8  |
| 24 | Cingulum_Mid_R       | 7.66  | -10.2  | 38.4  | 77  | Precuneus_L          | -7.59 | -57.3 | 46.6  |
| 25 | Cingulum_Post_L      | -5.21 | -44.2  | 23.3  | 78  | Precuneus_R          | 9.69  | -57.3 | 42.4  |
| 26 | Cingulum_Post_R      | 7.18  | -43.1  | 20.5  | 79  | Putamen_L            | -24.2 | 2.60  | 1.07  |
| 27 | Cuneus_L             | -6.26 | -81.4  | 25.8  | 80  | Putamen_R            | 27.5  | 3.68  | 1.19  |
| 28 | Cuneus_R             | 13.2  | -80.6  | 26.9  | 81  | Rolandic_Oper_L      | -47.4 | -9.78 | 12.6  |
| 29 | Frontal_Inf_Oper_L   | -48.8 | 11.5   | 17.8  | 82  | Rolandic_Oper_R      | 52.4  | -7.54 | 13.3  |
| 30 | Frontal_Inf_Oper_R   | 49.9  | 13.7   | 20.2  | 83  | Supp_Motor_Area_L    | -5.69 | 3.55  | 60.1  |
| 31 | Frontal_Inf_Orb_L    | -36.2 | 29.5   | -13.5 | 84  | Supp_Motor_Area_R    | 8.25  | -1.09 | 60.5  |
| 32 | Frontal_Inf_Orb_R    | 40.9  | 31.0   | -13.3 | 85  | SupraMarginal_L      | -56.1 | -34.9 | 29.1  |
| 33 | Frontal_Inf_Tri_L    | -45.9 | 28.7   | 12.6  | 86  | SupraMarginal_R      | 57.3  | -32.8 | 33.1  |
| 34 | Frontal_Inf_Tri_R    | 50.1  | 28.9   | 12.8  | 87  | Temporal_Inf_L       | -50.0 | -29.3 | -24.5 |
| 35 | Frontal_Med_Orb_L    | -5.44 | 52.5   | -8.86 | 88  | Temporal_Inf_R       | 53.4  | -32.1 | -23.7 |
| 36 | Frontal_Med_Orb_R    | 7.83  | 50.4   | -8.52 | 89  | Temporal_Mid_L       | -55.9 | -35.0 | -3.58 |
| 37 | Frontal_Mid_L        | -33.8 | 31.5   | 34.1  | 90  | Temporal_Mid_R       | 57.2  | -38.6 | -2.78 |
| 38 | Frontal_Mid_Orb_L    | -30.9 | 49.1   | -11.0 | 91  | Temporal_Pole_Mid_L  | -36.7 | 13.3  | -35.4 |
| 39 | Frontal_Mid_Orb_R    | 32.9  | 51.3   | -12.1 | 92  | Temporal_Pole_Mid_R  | 44.0  | 13.2  | -33.5 |
| 40 | Frontal_Mid_R        | 37.4  | 31.8   | 32.8  | 93  | Temporal_Pole_Sup_L  | -40.2 | 13.9  | -21.4 |
| 41 | Frontal_Sup_L        | -18.8 | 33.5   | 41.0  | 94  | Temporal_Pole_Sup_R  | 47.9  | 13.5  | -18.2 |
| 42 | Frontal_Sup_Medial_L | -5.17 | 47.9   | 29.6  | 95  | Temporal_Sup_L       | -53.4 | -22.0 | 5.84  |
| 43 | Frontal_Sup_Medial_R | 8.75  | 49.5   | 28.9  | 96  | Temporal_Sup_R       | 57.8  | -23.0 | 5.42  |
| 44 | Frontal_Sup_R        | 21.6  | 29.9   | 42.5  | 97  | Thalamus_L           | -11.2 | -18.8 | 6.61  |
| 45 | Fusiform_L           | -31.4 | -41.4  | -21.6 | 98  | Thalamus_R           | 12.7  | -18.8 | 6.73  |
| 46 | Fusiform_R           | 33.7  | -40.2  | -21.5 | 99  | Vermis_10            | 1.14  | -47.1 | -32.9 |
| 47 | Heschl_L             | -42.3 | -20.0  | 8.68  | 100 | Vermis_1_2           | 1.51  | -40.1 | -21.4 |
| 48 | Heschl_R             | 45.9  | -18.1  | 9.04  | 101 | Vermis_3             | 2.05  | -41.3 | -12.7 |
| 49 | Hippocampus_L        | -25.3 | -22.0  | -11.4 | 102 | Vermis_4_5           | 1.83  | -53.6 | -7.40 |
| 50 | Hippocampus_R        | 28.9  | -21.0  | -11.6 | 103 | Vermis_6             | 1.77  | -68.4 | -16.4 |
| 51 | Insula_L             | -35.4 | 5.40   | 2.17  | 104 | Vermis_7             | 1.87  | -73.2 | -26.4 |
| 52 | Insula_R             | 38.7  | 5.02   | 0.814 | 105 | Vermis_8             | 1.81  | -65.7 | -35.3 |
| 53 | Lingual_L            | -14.9 | -68.9  | -6.01 | 106 | Vermis_9             | 1.61  | -56.2 | -36.3 |
