# Supplementary material for: Extracting Multiscale Pattern Information of fMRI Based Functional Brain Connectivity with Application on Classification of Autism Spectrum Disorders
Source: PubMed Central journal article supplement (PMC3466274; doi:10.1371/journal.pone.0045502), 2012-10-08
Supplement: pone.0045502.s003.pdf [file pone.0045502.s003.pdf]

## Supplementary Material S3 for

### **Extracting multiscale pattern information of fMRI based functional brain connectivity with application on classification of autism spectrum disorders**

Hui Wang<sup>1</sup>, Chen Chen<sup>1</sup>, Hsieh Fushing<sup>1,\*</sup>

**1** Department of Statistics, University of California, Davis, One Shields Ave., Davis, CA, USA 95616

\* E-mail: [fushing@wald.ucdavis.edu](mailto:fushing@wald.ucdavis.edu)

This file contains one figure with fifty-eight sub figures.

Green Trial T=0.001 ASD Subject 1

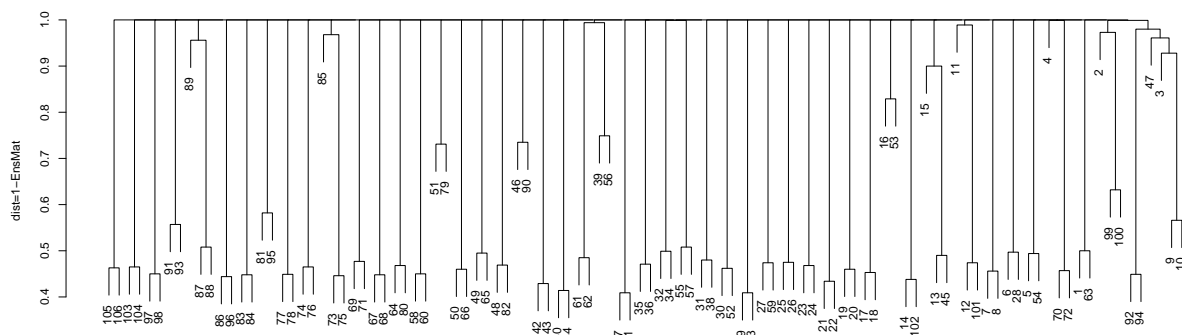

Green Trial T=0.001 ASD Subject 2

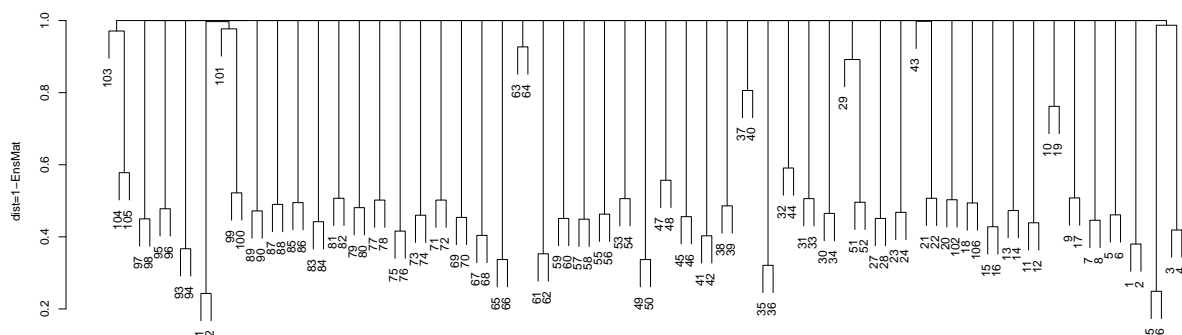

Green Trial T=0.001 ASD Subject 3

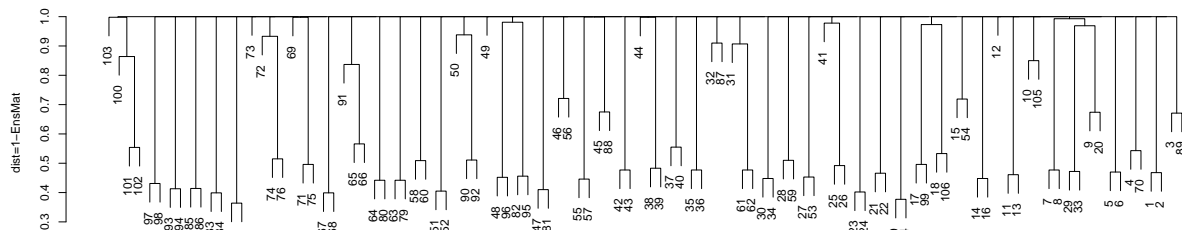

Green Trial T=0.001 ASD Subject 4

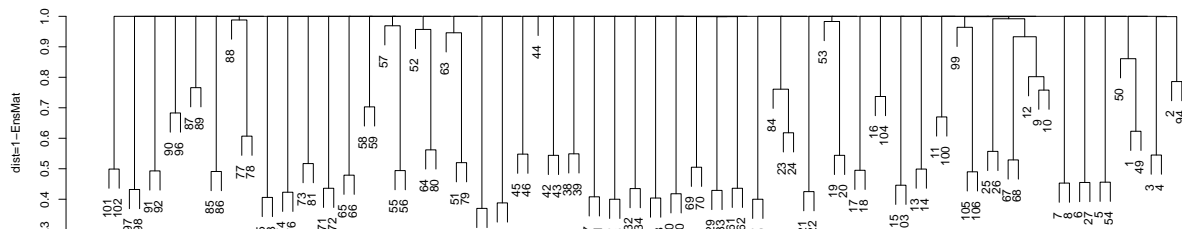

Green Trial T=0.001 ASD Subject 5

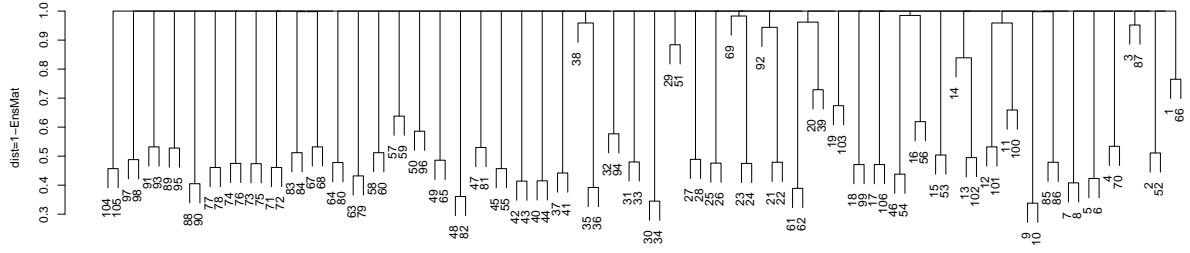

Green Trial T=0.001 ASD Subject 6

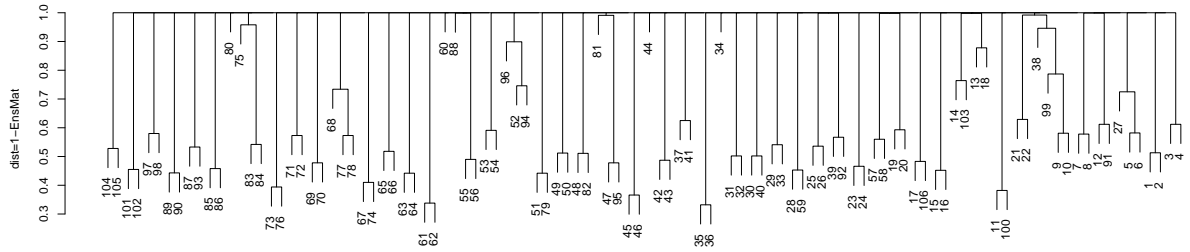

Green Trial T=0.001 ASD Subject 7

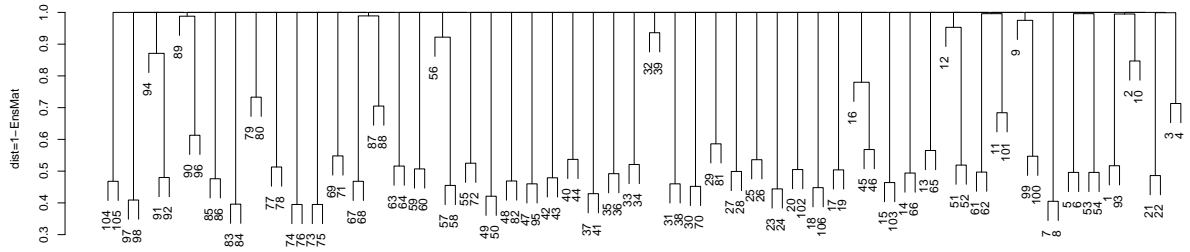

Green Trial T=0.001 ASD Subject 8

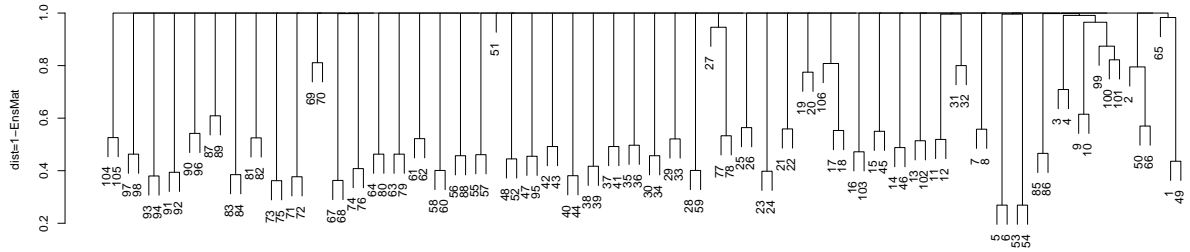

Green Trial T=0.001 ASD Subject 9

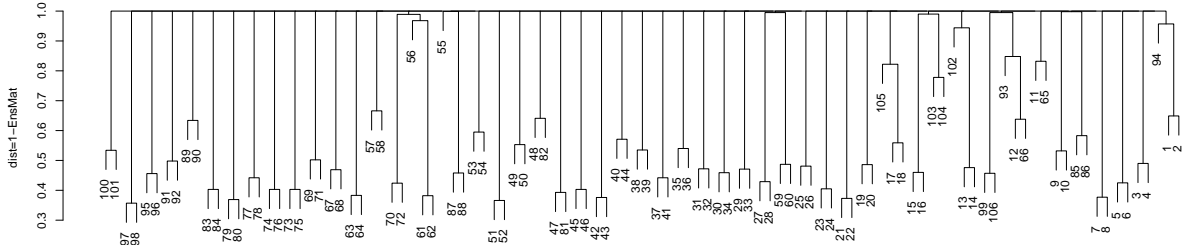

Green Trial T=0.001 ASD Subject 10

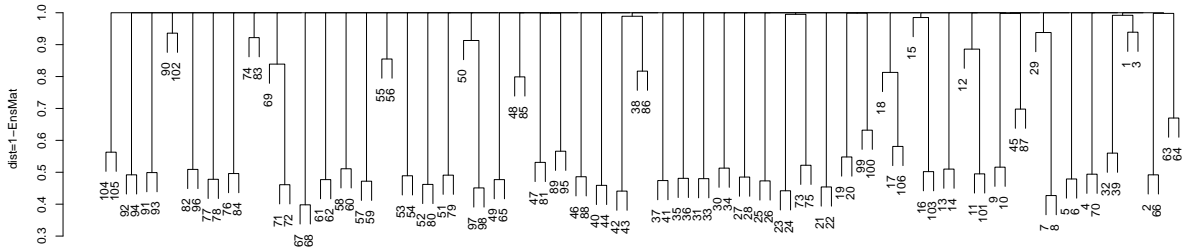

Green Trial T=0.001 ASD Subject 11

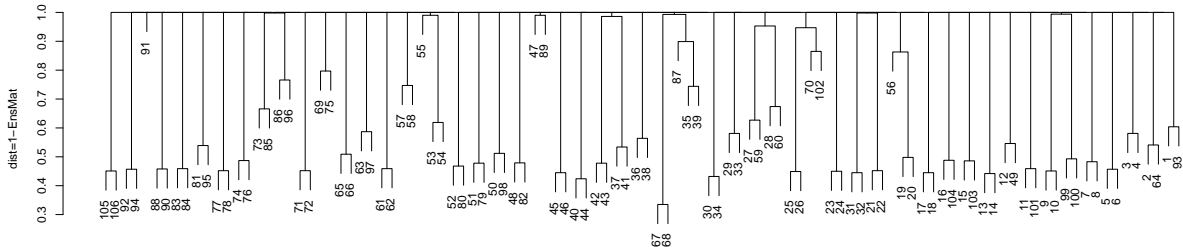

Green Trial T=0.001 ASD Subject 12

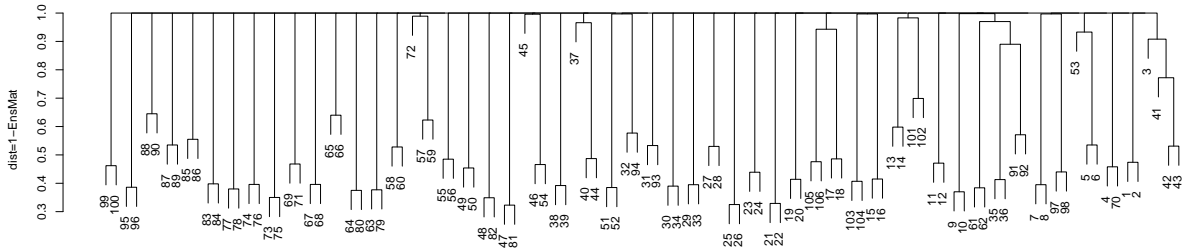

Green Trial T=0.001 ASD Subject 13

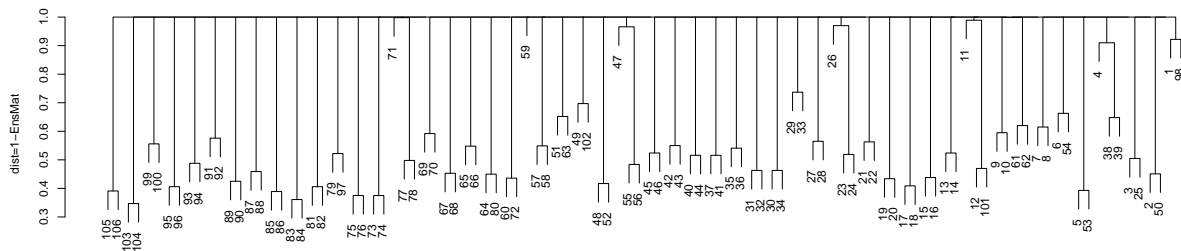

Green Trial T=0.001 ASD Subject 14

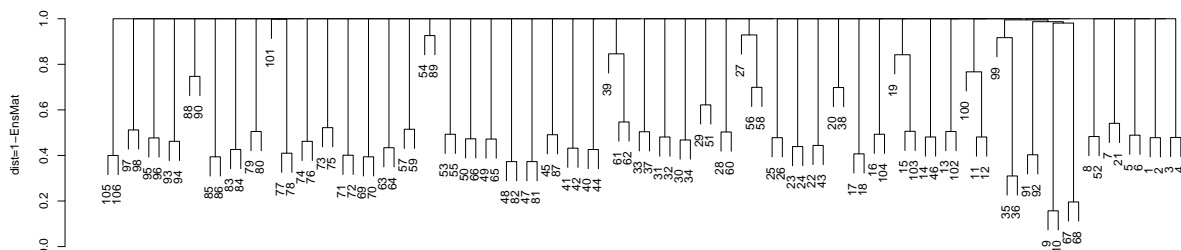

Green Trial T=0.001 ASD Subject 15

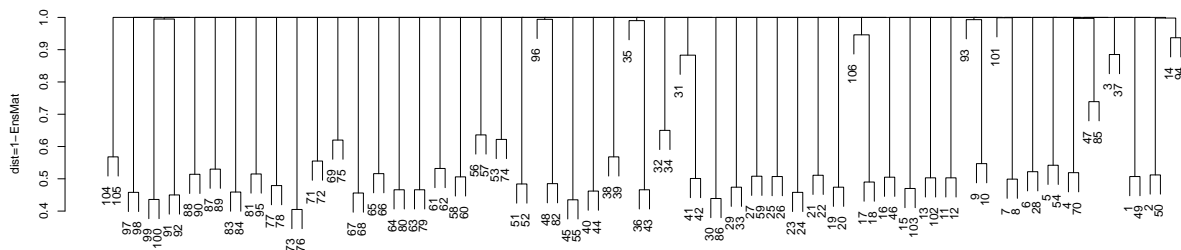

Green Trial T=0.001 ASD Subject 16

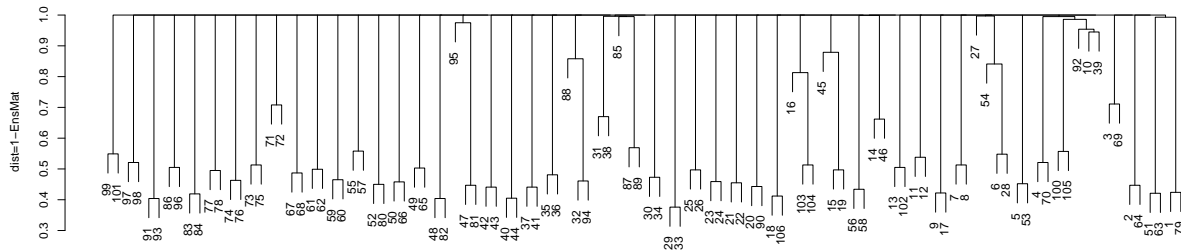

Green Trial T=0.001 ASD Subject 17

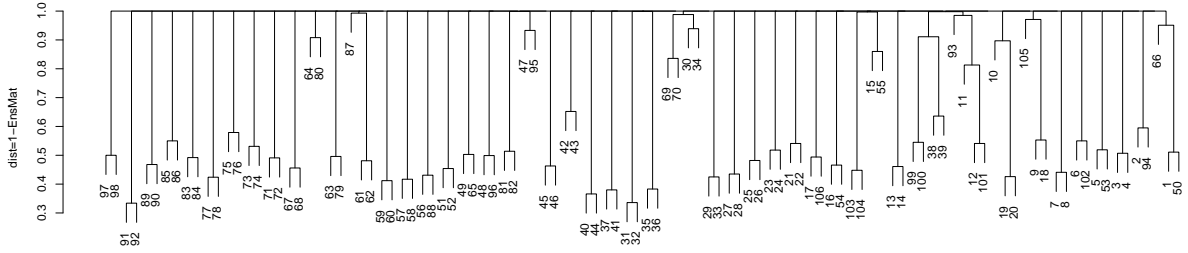

Green Trial T=0.001 ASD Subject 18

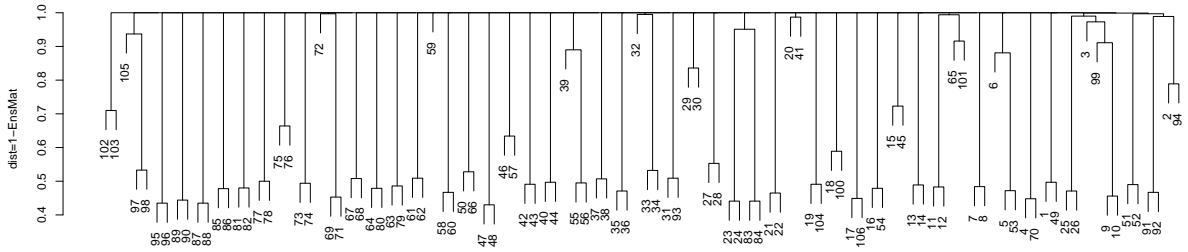

Green Trial T=0.001 ASD Subject 19

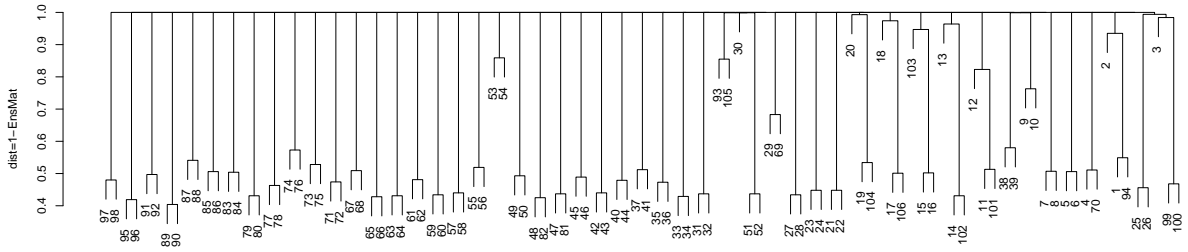

Green Trial T=0.001 ASD Subject 20

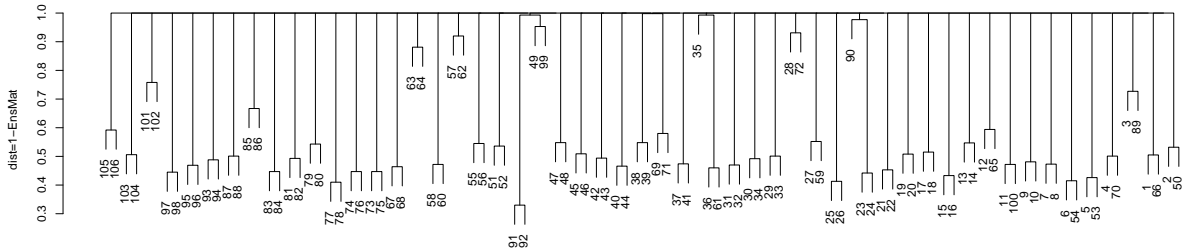

Green Trial T=0.001 ASD Subject 21

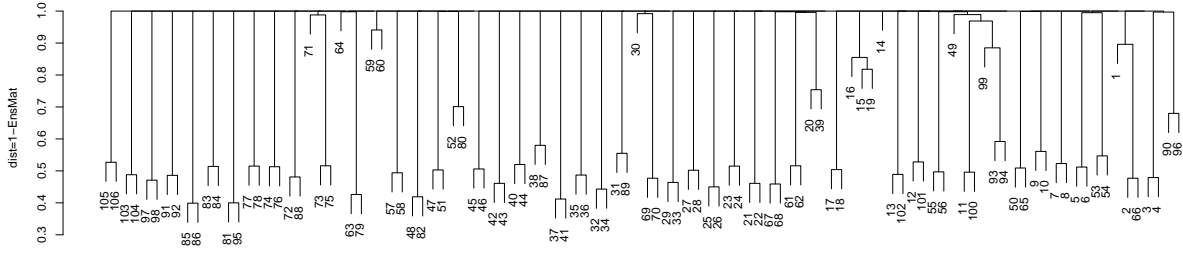

Green Trial T=0.001 ASD Subject 22

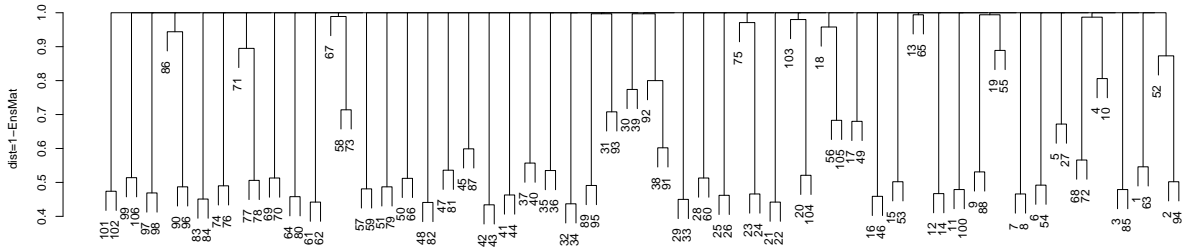

Green Trial T=0.001 ASD Subject 23

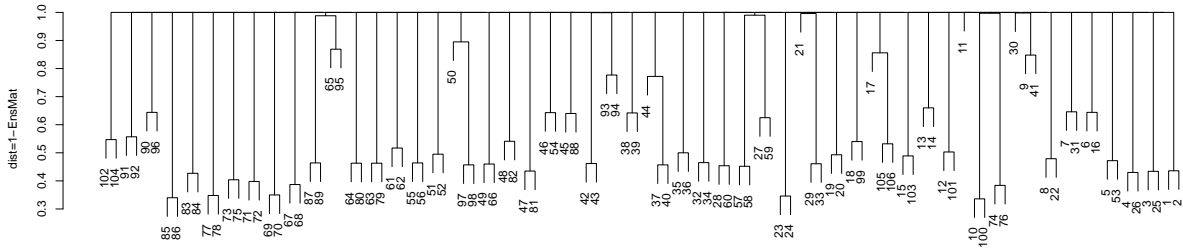

Green Trial T=0.001 ASD Subject 24

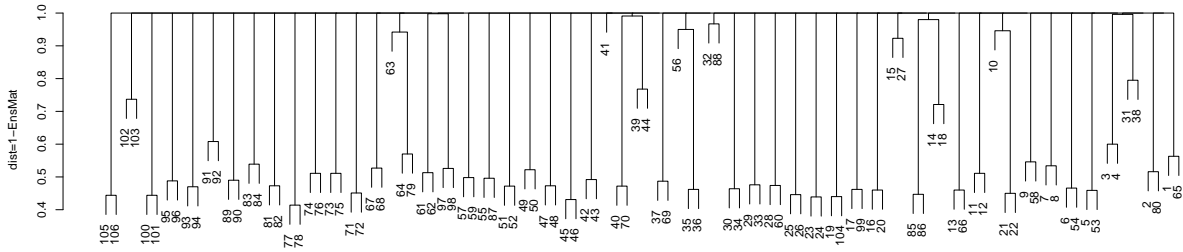

Green Trial T=0.001 ASD Subject 25

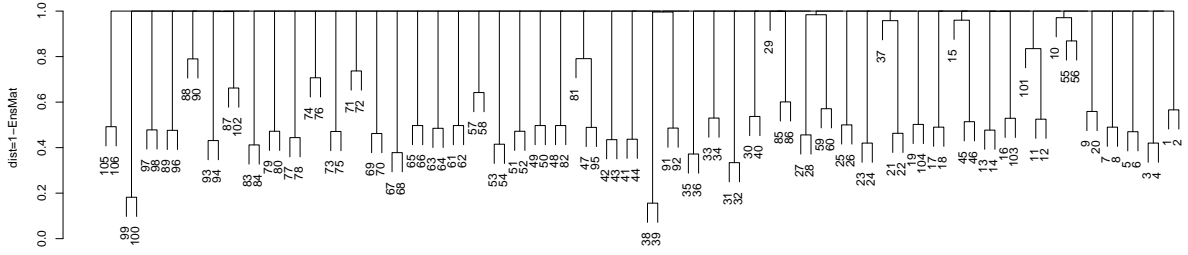

Green Trial T=0.001 ASD Subject 26

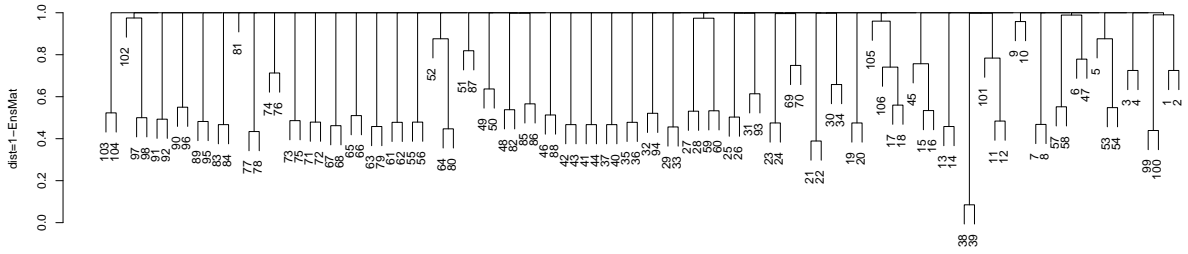

Green Trial T=0.001 ASD Subject 27

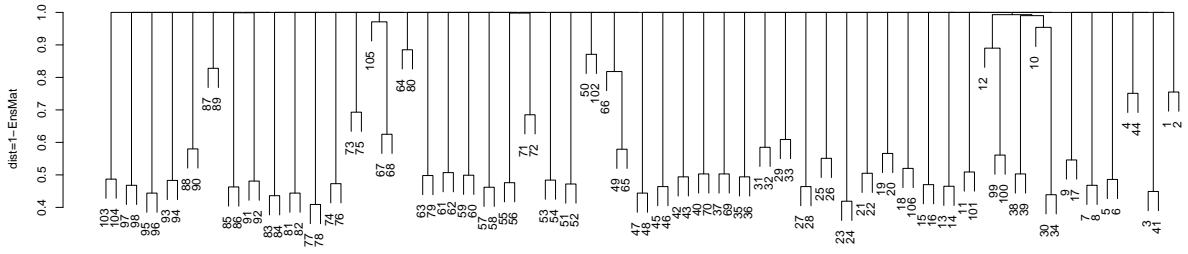

Green Trial T=0.001 ASD Subject 28

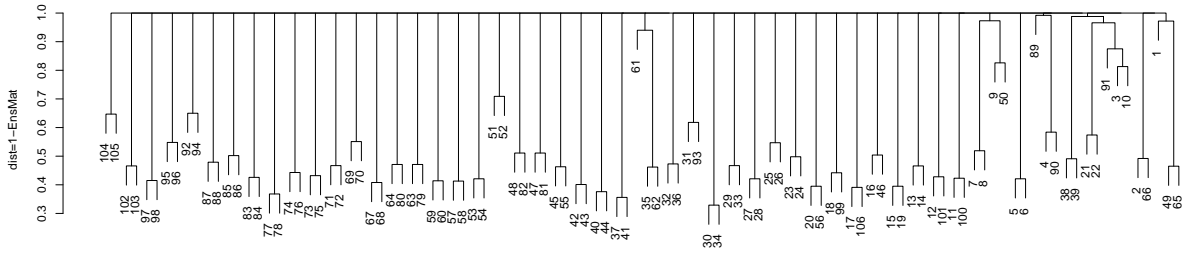



Green Trial T=0.001 ASD Subject 29

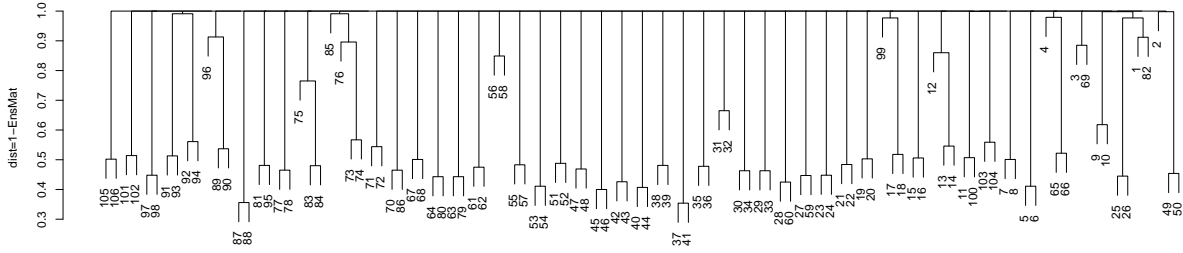

Green Trial T=0.001 Control Subject 1

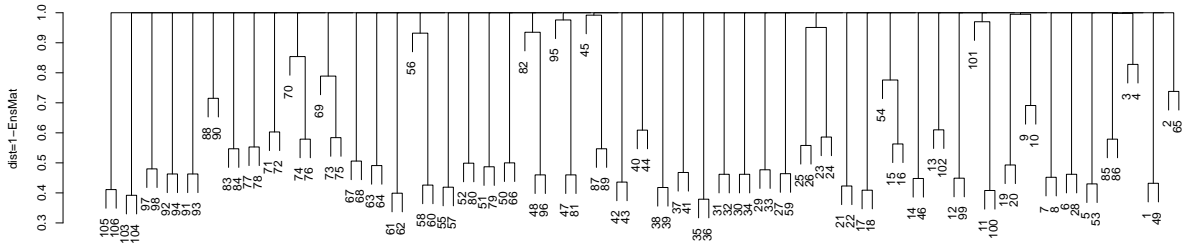

Green Trial T=0.001 Control Subject 2

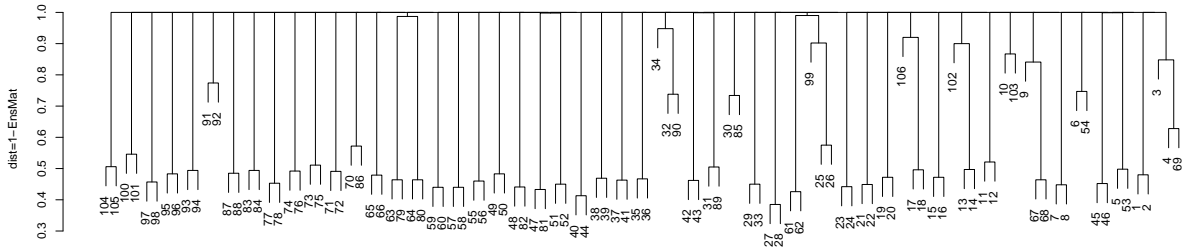

Green Trial T=0.001 Control Subject 3

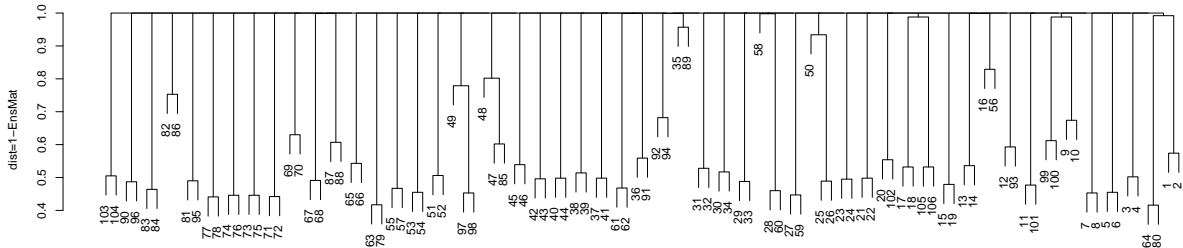

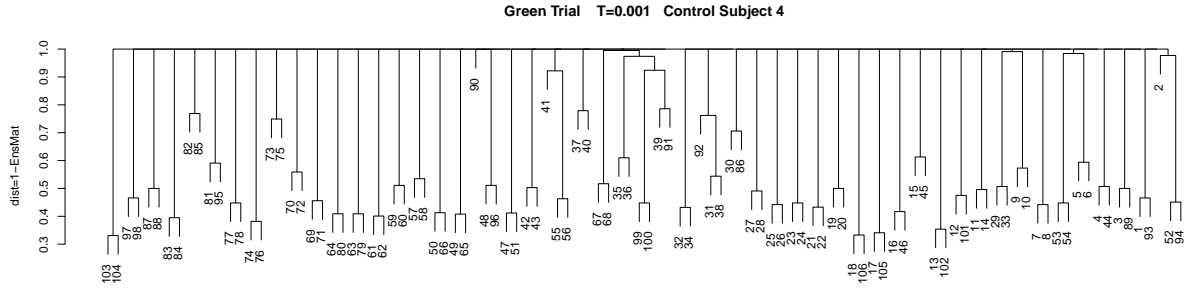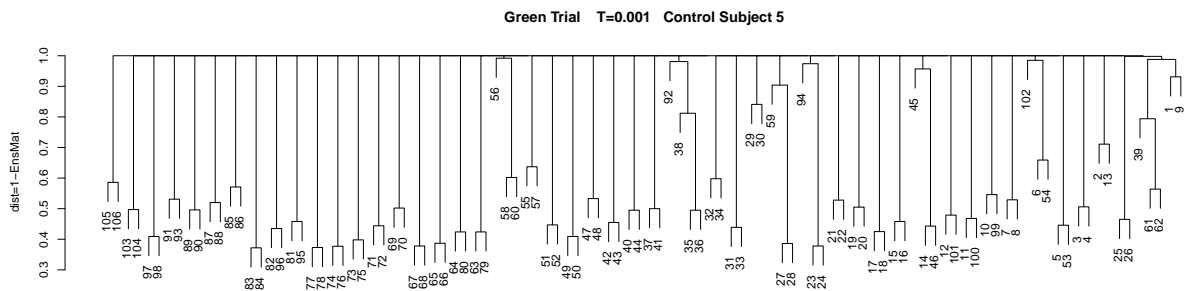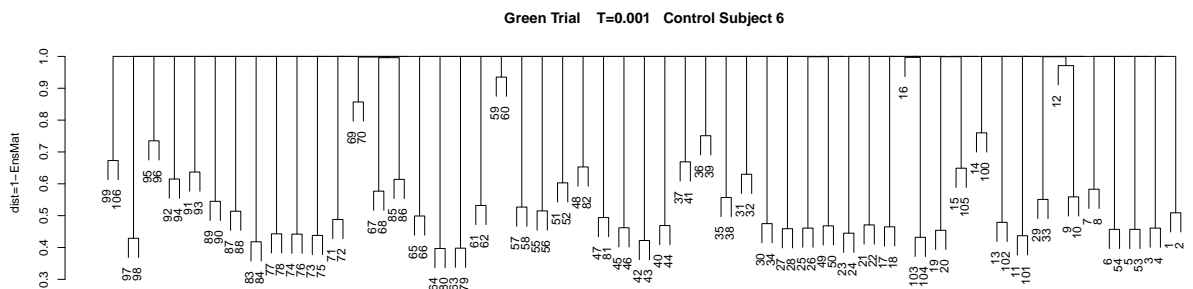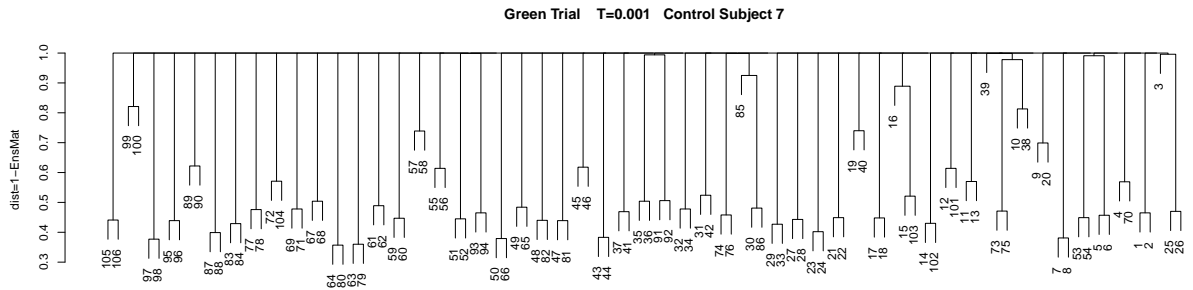

Green Trial T=0.001 Control Subject 8

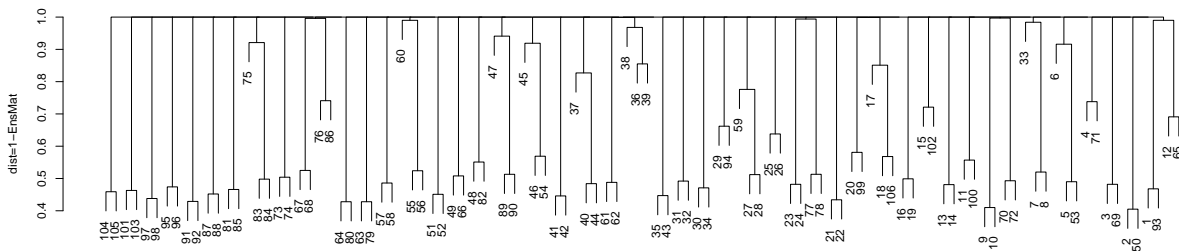

Green Trial T=0.001 Control Subject 9

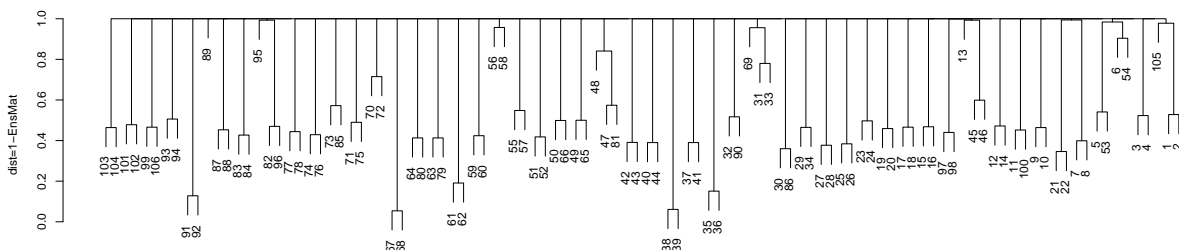

Green Trial T=0.001 Control Subject 10

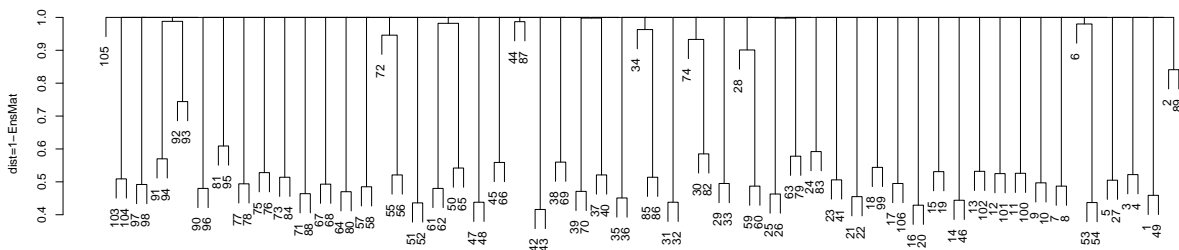

Green Trial T=0.001 Control Subject 11

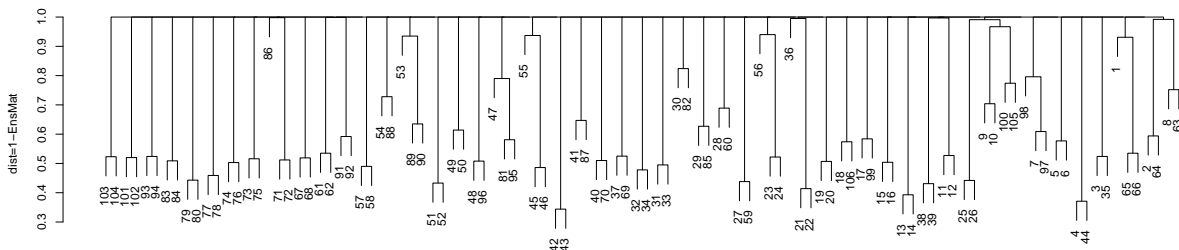

Green Trial T=0.001 Control Subject 12

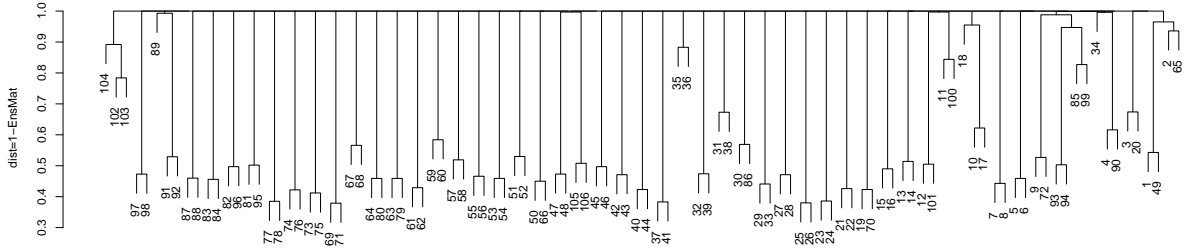

Green Trial T=0.001 Control Subject 13

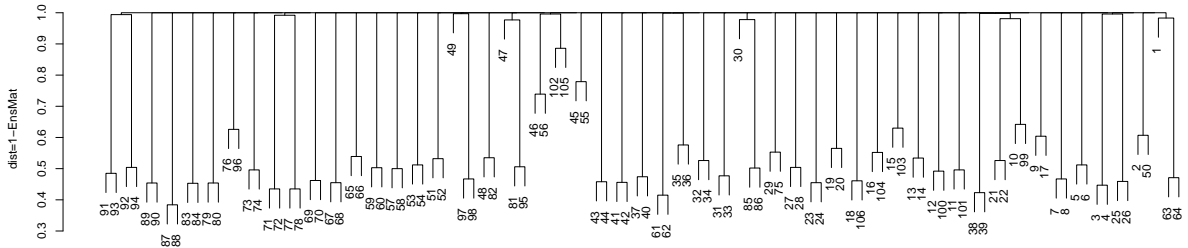

Green Trial T=0.001 Control Subject 14

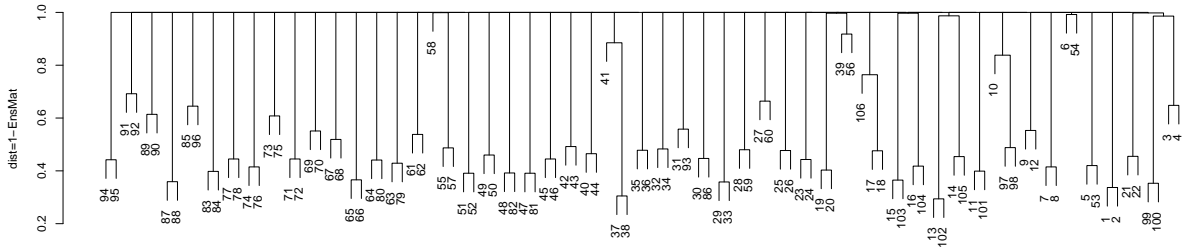

Green Trial T=0.001 Control Subject 15

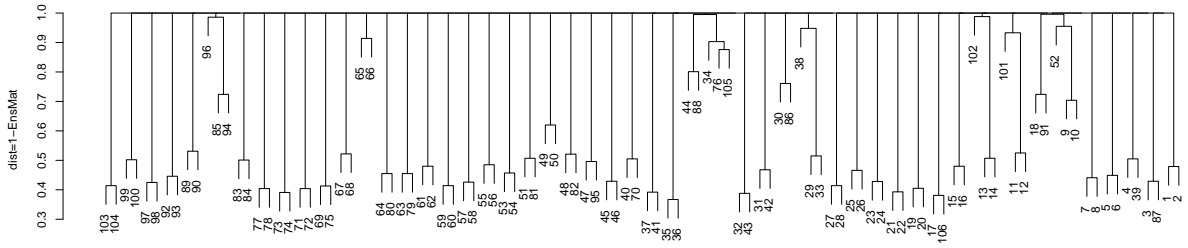

Green Trial T=0.001 Control Subject 16

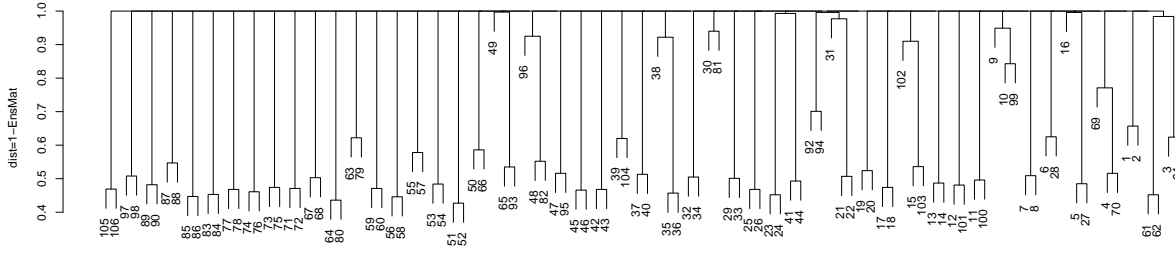

Green Trial T=0.001 Control Subject 17

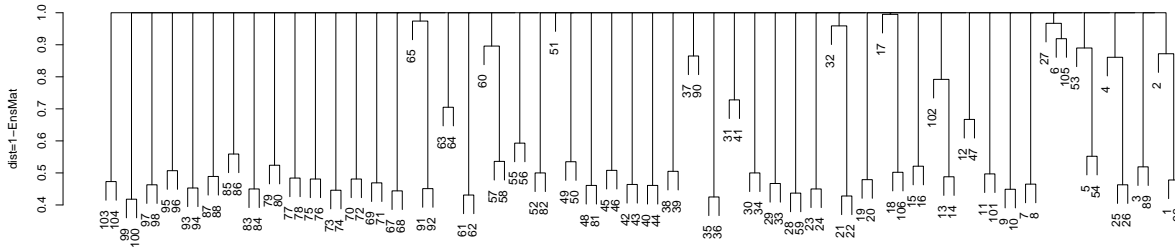

Green Trial T=0.001 Control Subject 18

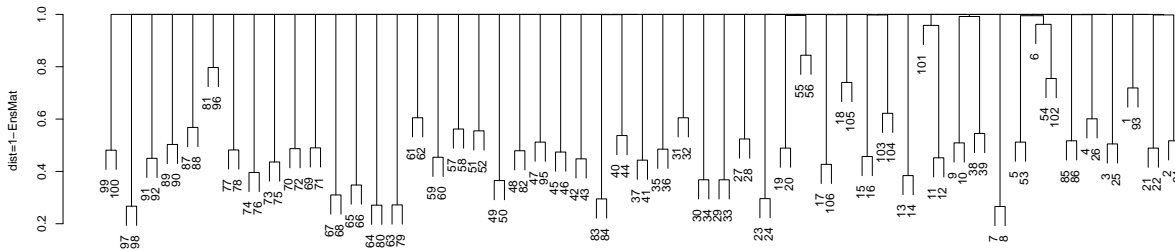

Green Trial T=0.001 Control Subject 19

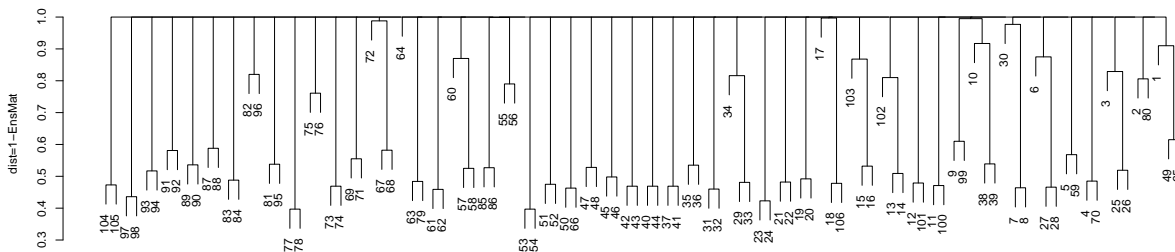

Green Trial T=0.001 Control Subject 20

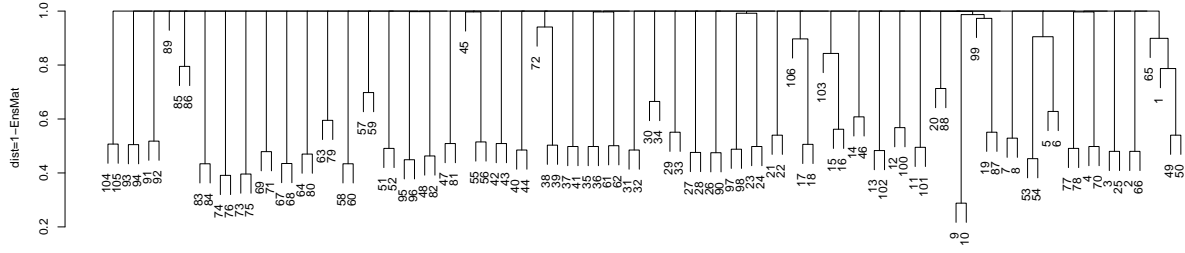

Green Trial T=0.001 Control Subject 21

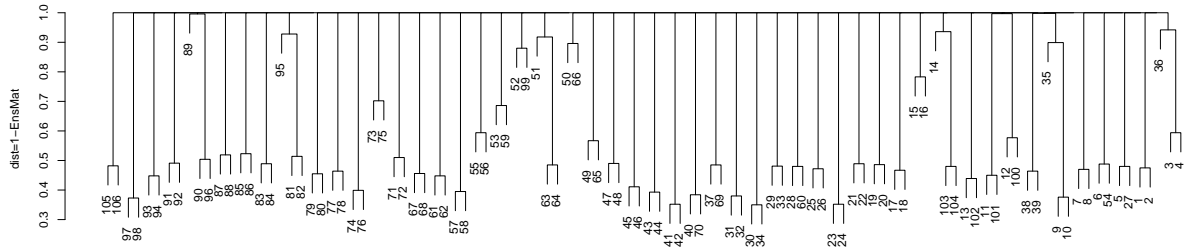

Green Trial T=0.001 Control Subject 22

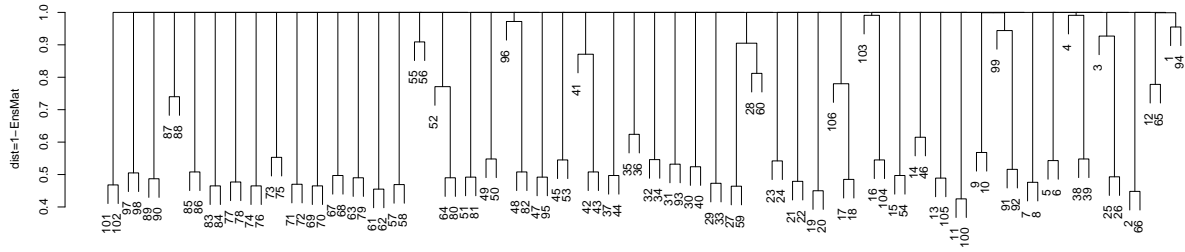

Green Trial T=0.001 Control Subject 23

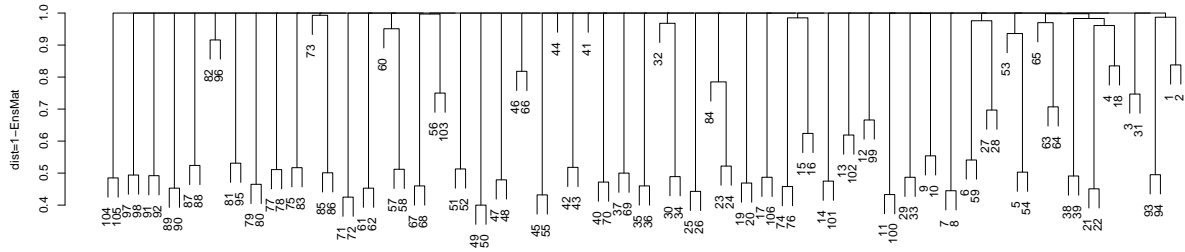

Green Trial T=0.001 Control Subject 24

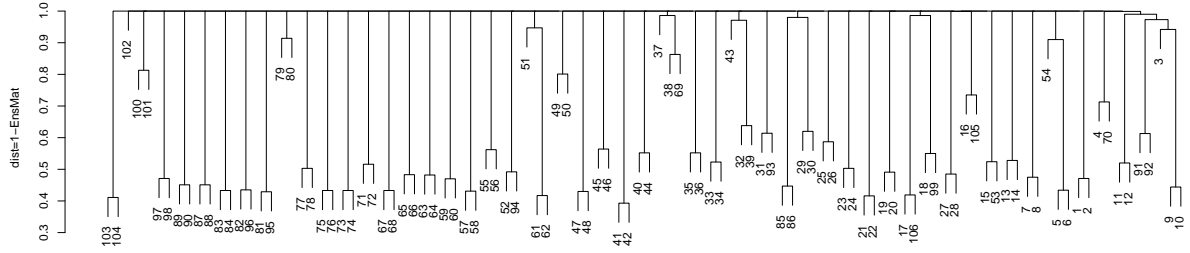

Green Trial T=0.001 Control Subject 25

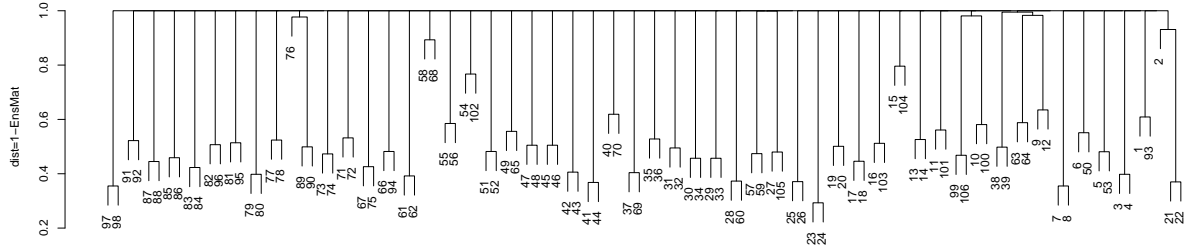

Green Trial T=0.001 Control Subject 26

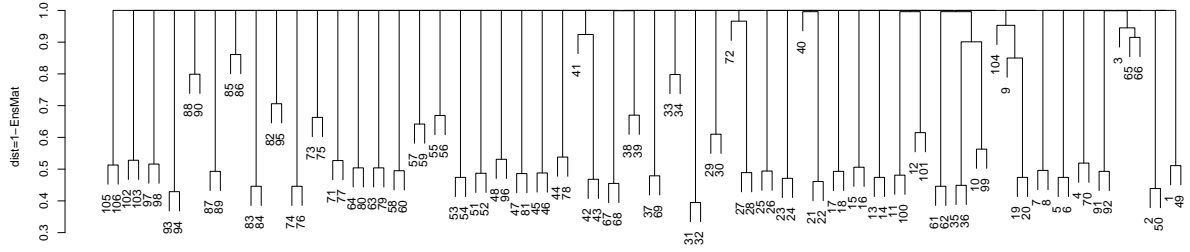

Green Trial T=0.001 Control Subject 27

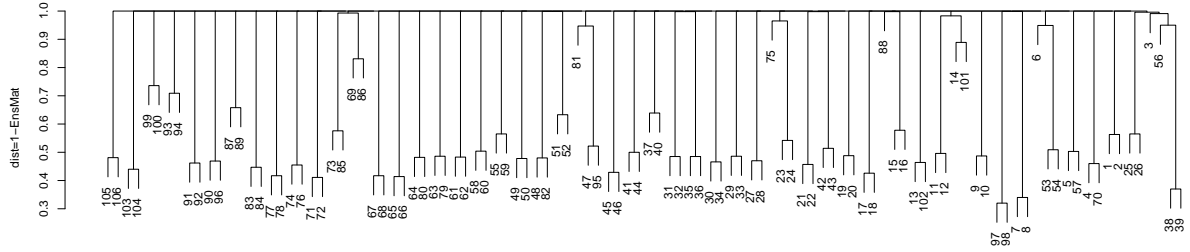

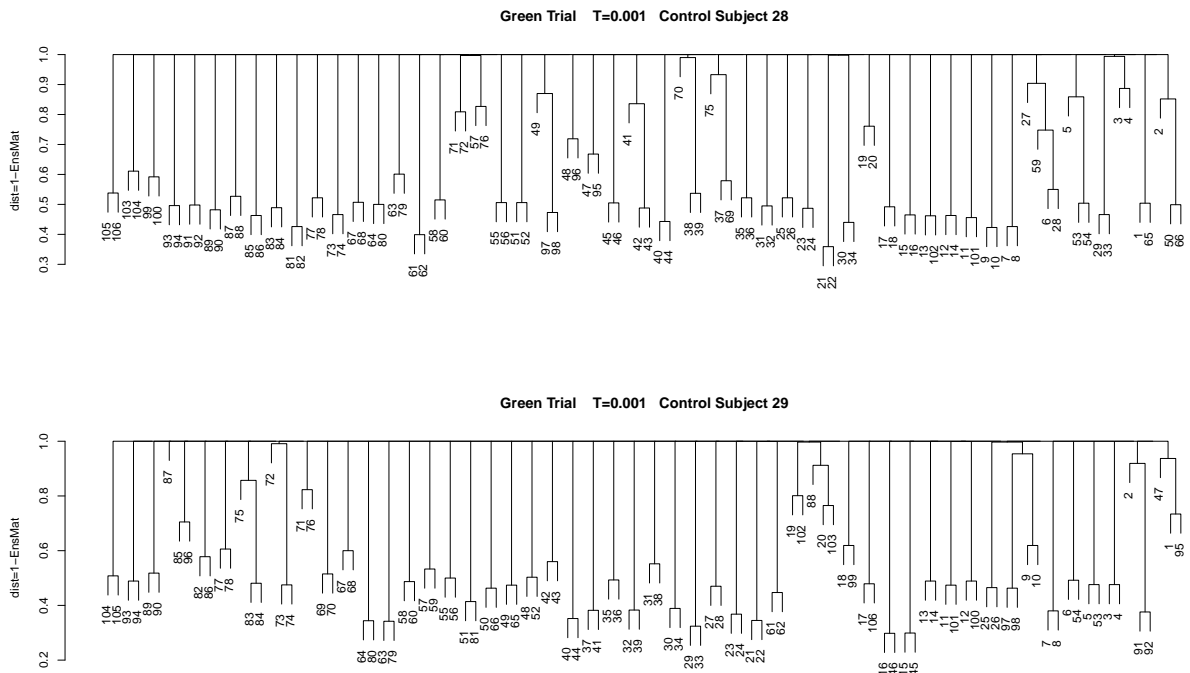

Figure 1. Hierarchical Clustering Tree of 106 ROIs for each subject in ASD group and TD group during Green Trials based on ensemble matrix (cluster-sharing probability matrix) obtained at T=0.001.
